# Supplementary material for: Adiponectin modulates ventral tegmental area dopamine neuron activity and anxiety-related behavior through AdipoR1
Source: PubMed Central journal article supplement (PMC6325675; doi:10.1038/s41380-018-0102-9), 2018-07-09
Supplement: 41380_2018_102_MOESM1_ESM.pdf [file 41380_2018_102_MOESM1_ESM.pdf]

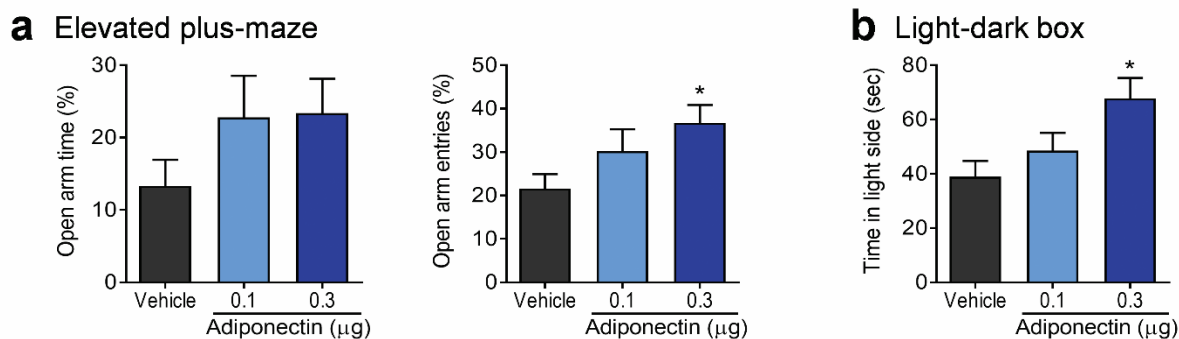

**Supplementary Figure 1. Intracerebroventricular infusion of full-length adiponectin produces anxiolytic effects.** Mice were implanted with guide cannula into the lateral ventricle (0.2 mm posterior, 1.1 mm lateral, and 2.7 mm ventral to the bregma). On the experimental day, a 33-gauge stainless-steel injector connected to a 5- $\mu\text{L}$  syringe was inserted into the guide cannula and extended 1 mm beyond the tip. Adiponectin (0.15  $\mu\text{g}/\mu\text{L}$ ) or artificial CSF (vehicle) was infused in a volume of 2  $\mu\text{L}$  over 2 min at 30 min before behavioral tests. **(a)** Elevated plus-maze test. Left, percentage of open/total arm time. Right, percentage of open/total arm entries. Vehicle:  $n = 18$  mice; Adiponectin 0.1  $\mu\text{g}$ :  $n = 10$  mice; Adiponectin 0.3  $\mu\text{g}$ :  $n = 14$  mice. **(b)** Light-dark box test. Time spent in the light compartment.  $n = 8$  mice per group. \* $P < 0.05$  compared with the vehicle-treated group.

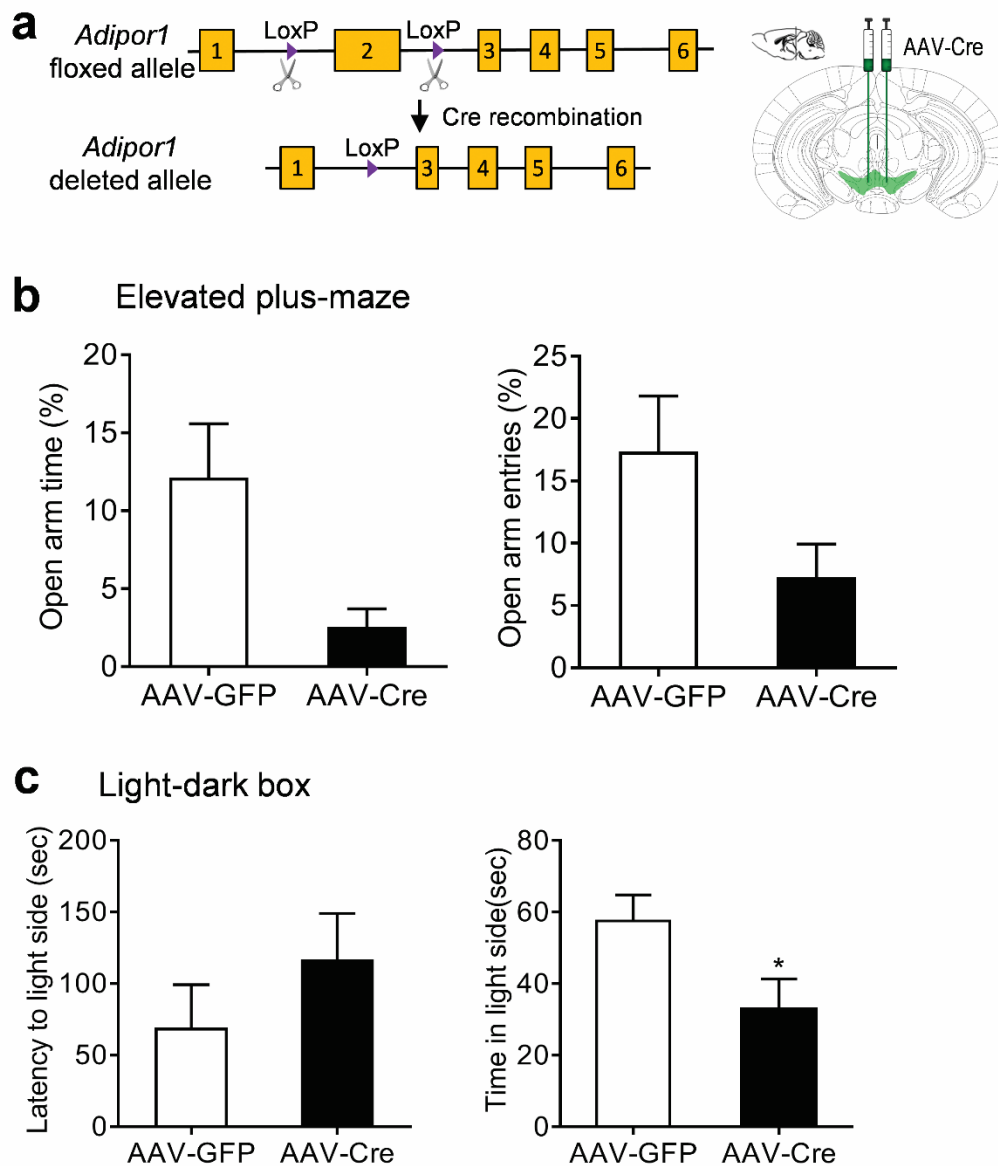

**Supplementary Figure 2. Conditional deletion of AdipoR1 in the VTA.** (a) Schematic diagram of AAV-Cre-induced deletion of AdipoR1 in the VTA. (b) Elevated plus-maze test.  $n = 7$  mice per group. (c) Light-dark box test. AAV-GFP:  $n = 7$  mice; AAV-Cre:  $n = 8$  mice.  $*P < 0.05$  compared with AAV-GFP injected mice.

**a** Elevated plus-maze

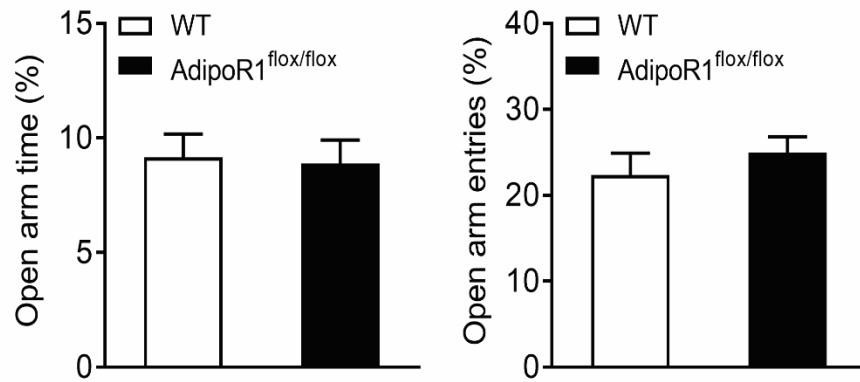

**b** Light-dark box

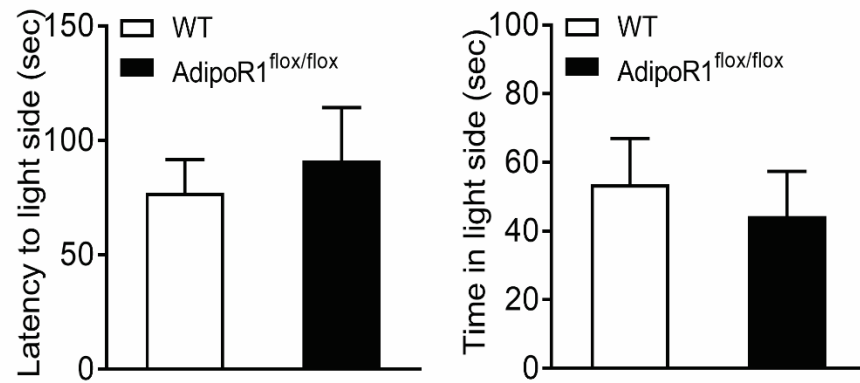

**Supplementary Figure 3. Behavioral phenotype of AdipoR1<sup>flox/flox</sup> mice.** (a) Elevated plus-maze test. WT: n = 7 mice, AdipoR1<sup>flox/flox</sup>: n = 6 mice. (b) Light-dark box test WT: n = 8 mice, AdipoR1<sup>flox/flox</sup>: n = 7 mice.
